# Supplementary material for: Glia control experience-dependent plasticity in an olfactory critical period
Source: eLife. 2025 Jan 30;13:RP100989. doi: 10.7554/eLife.100989 (PMC11781797; doi:10.7554/eLife.100989)
Supplement: Figure 1—source data 1. [file elife-100989-fig1-data1.xlsx]

## Sheet: Fig. 1D
	Source data for Leier & Foden et al. (2025)
	Figure 1D
Genotype		w; or42a-mcd8::GFP/+; repo-Gal4/+
Odorant exposure (0-2 DPE)		Mineral oil	5% EB	10% EB	15% EB
Measurement		VM7 volume (μm3)	VM7 volume (μm3)	VM7 volume (μm3)	VM7 volume (μm3)
		1296.08	1377.12	976.84	416.85
		1118.65	1270.94	1249.74	123.92
		1364.26	1737.32	767.49	968.9
		1208.94	1633.4	802.26	799.9
		1194.1	1560.32	1294	957.63
		1030.04	1216.56	959.14	315.45
		1177.28	1245.27	1528.87	45.06
		1035.06	1374.45	1025.25	33.79
		1040.2	1401.96	1397.91	304.19
		997.15	1212.71	1087.06	292.92
		1066.64	1029.96	962.36	1104.1
		1948.4	1288.37	884.06	856.24
		1293.3	1034.24		371.78
		1271.13	1142.66		563.31
		999.13	1669.9		1048.97
		571.59	1363.59		961.36
		956.97			1544.14
		1325.73			1729.35
		841.39			1126.43
		934.29			1164.29
		1386.27			661.84
		1299.42			778.48
		1170.6			966.34
		1269.57			905.32
		1128.6			1124.19
		1265.13			1139.94
		852.76			608.38
		995.87			439.38
		979.87			883.69
		1329.14			966.44
		1091.85			213.46
		923.34			327.19
		1006.94			178.86
		1068.63			362.48
		1134.66			788.03
		930.48			547.34
		1197.68			494.9
		838.48			746.7
		1155.24			1015.01
		1382.44			1145.59
		1012.2			708.96
		1073.15			1095.88
		1538.95			850.9
		1560.22			660.03
		618.69			1022.46
		743.13			794.76
		1340.53			880.35
		989.5			284.17
		862.13			607.48
		1036.68			442.2
		864.29			203.07
		1146.39			333.28
		1285.38			251.12
		1200.72			102.52
		1371.09			344.02
		1173.27			312.32
		1324.48			293.66
					650.59
					201.06
					368.13
					185.68
					158.39
					145.51
					97.67
					495.96
					665.66
					850.28
					1054.66
Descriptive statistics	Sample size (n)	57 ALs	16 ALs	12 ALs	68 ALs
	Normalized mean	1.001	1.195	0.9558	0.5625
	Std. Deviation	0.2069	0.1889	0.2142	0.3395
Shapiro-Wilk normality test	W	0.9668	0.9496	0.9375	0.9536
	p value	0.1183	0.4841	0.4661	0.013
Kruskal-Wallis test	p value	<0.0001
Dunn's multiple comparisons test	Comparison	n/A	Mineral oil	Mineral oil	Mineral oil
	Mean rank diff.	n/A	-28.4	9.217	53.45
	p value	n/A	0.1409	>0.9999	<0.0001

## Sheet: Fig. 1E
Source data for Leier & Foden et al. (2025)
Figure 1E
Genotype		w; or42a-mcd8::GFP/+; repo-Gal4/+
Odorant exposure (0-2 DPE)		Mineral oil	5% EB	10% EB	15% EB
Measurement		No. Brp puncta	No. Brp puncta	No. Brp puncta	No. Brp puncta
		889	885	904	194
		888	1121	618	848
		688	1104	710	418
		925	864	603	42
		845	821	604	392
		895	1162	948	1069
		861	949	738	505
		729	1080	691	438
		928	699	747	887
		850	708	667	820
		1456	708	829	49
		928	946	668	361
		477	884		820
		739	672		692
		953	767		885
		742	961		775
		675			1308
		646			1356
		1031			835
		996			1036
		1204			694
		724			623
		1130			700
		999			780
		1080			803
		727			763
		1060			394
		941			480
		887			891
		862			951
		1050			314
		1140			463
		949			308
		1173			502
		784			1163
		877			629
		890			597
		797			286
		751			162
		786			768
		1231			182
		996			506
		1248			624
		677			441
		1322			475
		1249			427
		560			316
		641			590
		816			221
		839			714
		671			454
		784			709
		939			600
		858			119
		738			284
		837			330
		1040			363
					236
					103
					314
					481
					274
					280
					158
					514
					640
					54
					692
Descriptive statistics	Sample size (n)	57 ALs	16 ALs	12 ALs	68 ALs
	Normalized mean	1	0.9937	0.8068	0.6053
	Std. Deviation	0.2181	0.1792	0.1261	0.3332
Shapiro-Wilk normality test	W	0.9761	0.9334	0.901	0.9731
	p value	0.3164	0.2763	0.1636	0.1483
Kruskal-Wallis test	p value	<0.0001
Dunn's multiple comparisons test	Comparison	n/A	Mineral oil	Mineral oil	Mineral oil
	Mean rank diff.	n/A	-0.6321	33.27	54.24
	p value	n/A	>0.9999	0.1084	<0.0001

## Sheet: Fig. 1G
Source data for Leier & Foden et al. (2025)
Figure 1G
Genotype		w; or42a-mcd8::GFP/+; repo-Gal4/+
Odorant exposure (0-2 DPE)		Mineral oil	15% EB
Measurement		Mean firing rate (Hz)	Mean firing rate (Hz)
		1.86	0.11
		1.63	0
		1.08	0.02
		0.6	0
		0.47	0
			0
			0
Descriptive statistics	Sample size (n)	5 brains	7 brains
	Mean	1.127	0.01749
	Std. Deviation	0.6142	0.03942
Shapiro-Wilk normality test	W	0.9163	0.54
	p value	0.5067	<0.0001
Mann Whitney test	p value	0.0025

## Sheet: Fig. 1H
Source data for Leier & Foden et al. (2025)
Figure 1H
Genotype		w; or42a-mcd8::GFP/+; repo-Gal4/+
Odorant exposure (0-2 DPE)		Mineral oil	15% EB
Measurement		Interspike interval (ms)	Interspike interval (ms)
		664.2	1397.9
		321.2	887.6
		631.3	1710.7
		733.3	4898.2
		494.4	1324.1
		551.1	715.6
		651.1	1092.7
		306.9	2336.1
		568.4	1608.1
		617.1	2864.3
		601.6	1250.7
		537.9	5246.1
		395.5	2953
		394.4	1373.5
		828	1366.3
		408	3366
		424.8	2089.9
		666	1459.3
		469.6	1874.4
		205.9	1689.9
		396.2	1247.3
		799.9	101.1
		415	3298.5
		681.1	1100
		447.2	1728.9
		664.1	1025.2
		612.4	1587.2
		472.3	1586
		607.3	1718.6
		612.6	935.7
		456.1	2467.1
		316.1	1358.2
		291.2	1052.3
		850.9	1640
		446.7	133.9
		572.6	1205.6
		658.4	1779.8
		381.3	1634.3
		303.6	985.1
		768	677.2
		517.5	950.6
		434.6	1943.5
		705	2286.9
		425.9	3446.8
		326	924
		453	1771.8
		789	821.4
		511.3	3317.2
		462.3	1486.1
		514.9	2235.7
		334.9	109.5
		462.1	672.1
		704.5	1201.9
		385.1	658.4
		590.4	2827.4
		782	1165.2
		647.8	3547.8
		469.1	820.3
		871.7	1339.8
		502.9	2093.6
		506.9	1898.1
		674	1892.5
		748.7	812
		488.6	5484.5
		650.6
		545.2
		625.1
		784
		672.1
		471.7
		684.9
		565.6
		579.5
		807.2
		546.7
		466.5
		787.6
		839.3
		425.1
		730.1
		540.4
		361.1
		399.3
		1011.5
		519.2
		664.3
		598.1
		531.8
		749.8
		783.3
		526.8
		434.8
		748.9
		620.9
		447.3
		573.1
		639.1
		426.3
		517.6
		773.3
		572.8
		424.9
		743.6
		1387.8
		1450.2
		944.3
		1169.6
		936.6
		1056.7
		771.8
		757.1
		1128.8
		1103.9
		774.9
		1010.4
		1004.3
		1106.7
		771.4
		890.7
		1077.4
		549.5
		1406.2
		1194.7
		764.7
		783.4
		1057.3
		590.1
		858.1
		959.6
		1307.5
		769.1
		864.2
		600.8
		594.9
		546.9
		342.1
		441.8
		426.6
		886.2
		555.1
		587.1
		1034.7
		949.3
		412.8
		1344.4
		628.5
		882.7
		1017.7
		691.7
		386.2
		329.1
		1029.4
		714.5
		747
		2244.4
		604.8
		935.9
		555.3
		1474
		2185.1
		2043.8
		691.6
		429
		2465.6
		934.1
		742.9
		874
		3031.2
		4117.8
		998.7
		470.8
		643.1
		616
		604.6
		649.4
		387
		574.7
		444.9
		607.2
		720
		441.1
		1056.1
		645.1
		685.5
		396.3
		995.4
		679.7
		1091
		1392
		1193.8
		972.5
		986.9
		1187.8
		1488.8
		956.7
		1244.4
Descriptive statistics	Sample size (n)	196 spikes	64 spikes
	Minimum	205.9	101.1
	25% Percentile	490.1	1032
	Median	648.6	1536
	75% Percentile	869.8	2093
	Maximum	4118	5485

## Sheet: Fig. 1I
Source data for Leier & Foden et al. (2025)
Figure 1I
Genotype		w; or42a-mcd8::GFP/+; repo-Gal4/+
Odorant exposure (0-2 DPE)		Mineral oil	15% EB
Measurement		Spike onset latency (ms)	Spike onset latency (ms)
		0.848148	0.854167
		0.851064	0.8
		0.846667
		0.954286
		0.433333
Descriptive statistics	Sample size (n)	5 brains	2 brains
	Mean	0.7867	0.8271
	Std. Deviation	0.2028	0.0383
Shapiro-Wilk normality test	W	0.7334	n/A
	p value	0.0207
Mann Whitney test	p value	>0.9999

## Sheet: Fig. 1J
Source data for Leier & Foden et al. (2025)
Figure 1J
Genotype		w; or42a-mcd8::GFP/+; repo-Gal4/+
Odorant exposure (0-2 DPE)		Mineral oil	15% EB
Measurement		Afterhyperpolarization decay time constant (ms)	Afterhyperpolarization decay time constant (ms)
		94.2804	150.864
		102.402	41.3558
		93.706
		47.0205
		126.28
Descriptive statistics	Sample size (n)	5 brains	2 brains
	Mean	92.74	96.11
	Std. Deviation	28.77	77.43
Shapiro-Wilk normality test	W	0.906	n/A
	p value	0.444
Mann Whitney test	p value	>0.9999
