# Supplementary material for: Glia control experience-dependent plasticity in an olfactory critical period
Source: eLife. 2025 Jan 30;13:RP100989. doi: 10.7554/eLife.100989 (PMC11781797; doi:10.7554/eLife.100989)
Supplement: Figure 2—source data 1. [file elife-100989-fig2-data1.xlsx]

## Sheet: Fig. 2D
Source data for Leier & Foden et al. (2025)
Figure 2D
Genotype		w; or42a-mcd8::GFP/+; repo-Gal4/+
Odorant exposure (-2-0 DPE)		Mineral oil	15% EB
Measurement		VM7 volume (μm3)	VM7 volume (μm3)
		793.19	874.53
		662.13	593.79
		833.86	597.84
		986.6	744.98
		931.4	809.79
		1045.16	691.65
		941.7	874.91
		1193.06	894.14
		874.23	959.54
		763.99	1181.56
			882.22
			970.82
			978.81
			156.18
			130.36
			772.92
			847.62
			739.29
			818.84
			717.92
			938.95
			893.34
			1027.56
Descriptive statistics	Sample size (n)	10 ALs	23 ALs
	Normalized mean	1	0.8991
	Std. Deviation	0.1639	0.2704
Shapiro-Wilk normality test	W	0.9784	0.7983
	p value	0.956	0.0004
Mann Whitney test	p value	0.406

## Sheet: Fig. 2E
Source data for Leier & Foden et al. (2025)
Figure 2E
Genotype		w; or42a-mcd8::GFP/+; repo-Gal4/+
Odorant exposure (0-2 DPE)		Mineral oil	15% EB
Measurement		VM7 volume (μm3)	VM7 volume (μm3)
		1296.08	416.854
		1118.65	123.93
		1364.26	968.905
		1208.94	799.91
		1194.1	957.638
		1030.04	315.457
		1177.28	45.0653
		1035.06	33.799
		1040.2	304.191
		997.15	292.925
		1066.64	1104.1
		1948.4	856.241
		1293.3	371.789
		1271.13	563.317
		999.13	1047.77
		571.59	957.638
		956.97	1543.49
		1325.73	1723.75
		841.39	1126.63
		934.29	1160.43
		1386.27	664.714
		1299.42	777.377
		1170.6	968.905
		1269.57	901.307
		1128.6	1126.63
		1265.13	1137.9
		852.76	608.382
		995.87	439.387
		979.87	878.774
		1329.14	968.905
		1091.85	214.06
		923.34	326.724
		1006.94	180.261
		1068.63	360.523
		1134.66	788.643
		930.48	552.05
		1197.68	495.719
		838.48	743.578
		1155.24	1013.97
		1382.44	1149.17
		1012.2	709.779
		1073.15	1092.83
		1538.95	856.241
		1560.22	664.714
		618.69	1025.24
		743.13	799.91
		1340.53	878.774
		989.5	281.658
		862.13	608.382
		1036.68	439.387
		864.29	202.794
		1146.39	337.99
		1285.38	247.859
		1200.72	101.397
		1371.09	349.256
		1173.27	315.457
		1324.48	292.925
			653.447
			202.794
			371.789
			180.261
			157.729
			146.462
			101.397
			495.719
			664.714
			844.975
			1059.04
Descriptive statistics	Sample size (n)	57 ALs	68 ALs
	Normalized mean	1.001	0.5625
	Std. Deviation	0.2069	0.3395
Shapiro-Wilk normality test	W	0.9668	0.9536
	p value	0.1183	0.013
Mann Whitney test	p value	<0.0001

## Sheet: Fig. 2F
Source data for Leier & Foden et al. (2025)
Figure 2F
Genotype		w; or42a-mcd8::GFP/+; repo-Gal4/+
Odorant exposure (2-4 DPE)		Mineral oil	15% EB
Measurement		VM7 volume (μm3)	VM7 volume (μm3)
		260.17	887.34
		330.32	1113.29
		926.19	1082.38
		1066.09	1062.04
		908.2	776.37
		976.19	809.17
		627.68	736.57
		540.88	696.82
		768.1	292.27
		706.64	456.61
		597.27	885.5
		792.24	915.24
		917.58	777.29
		647.72	878.73
		964.46
Descriptive statistics	Sample size (n)	15 ALs	14 ALs
	Normalized mean	1	1.104
	Std. Deviation	0.3232	0.3088
Shapiro-Wilk normality test	W	0.9399	0.9169
	p value	0.3809	0.1984
Mann Whitney test	p value	0.4773

## Sheet: Fig. 2G
Source data for Leier & Foden et al. (2025)
Figure 2G
Genotype		w; or42a-mcd8::GFP/+; repo-Gal4/+
Odorant exposure (-2-0 DPE)		Mineral oil	15% EB
Measurement		No. Brp puncta	No. Brp puncta
		964	1213
		1304	1154
		907	1178
		1048.58	266
		1213.14	878
		1227.91	807
		926.207	1047
		1443.11	1352
		1038.03	1420
		1021.15	1123
		548.55	174
			1125
			962
			1010
			1103
			1216
			890.309
			1385.65
			1187.08
			1320.19
			792.114
			774.657
Descriptive statistics	Sample size (n)	11 ALs	22 ALs
	Normalized mean	1	0.9611
	Std. Deviation	0.226	0.3025
Shapiro-Wilk normality test	W	0.9529	0.8756
	p value	0.6812	0.01
Mann Whitney test	p value	0.8362

## Sheet: Fig. 2H
Source data for Leier & Foden et al. (2025)
Figure 2H
Genotype		w; or42a-mcd8::GFP/+; repo-Gal4/+
Odorant exposure (0-2 DPE)		Mineral oil	15% EB
Measurement		No. Brp puncta	No. Brp puncta
		889	194
		888	848
		688	418
		925	42
		845	392
		895	1069
		861	505
		729	438
		928	887
		850	820
		1456	49
		928	361
		477	820
		739	692
		953	885
		742	775
		675	1308
		646	1356
		1031	835
		996	1036
		1204	694
		724	623
		1130	700
		999	780
		1080	803
		727	763
		1060	394
		941	480
		887	891
		862	951
		1050	314
		1140	463
		949	308
		1173	502
		784	1163
		877	629
		890	597
		797	286
		751	162
		786	768
		1231	182
		996	506
		1248	624
		677	441
		1322	475
		1249	427
		560	316
		641	590
		816	221
		839	714
		671	454
		784	709
		939	600
		858	119
		738	284
		837	330
		1040	363
			236
			103
			314
			481
			274
			280
			158
			514
			640
			54
			692
Descriptive statistics	Sample size (n)	57 ALs	68 ALs
	Normalized mean	1	0.6053
	Std. Deviation	0.2181	0.3332
Shapiro-Wilk normality test	W	0.9761	0.9731
	p value	0.3164	0.1483
Mann Whitney test	p value	<0.0001

## Sheet: Fig. 2I
Source data for Leier & Foden et al. (2025)
Figure 2I
Genotype		w; or42a-mcd8::GFP/+; repo-Gal4/+
Odorant exposure (2-4 DPE)		Mineral oil	15% EB
Measurement		No. Brp puncta	No. Brp puncta
		239	895
		665	745
		661	750
		669	615
		545	377
		384	650
		536	618
		330	834
		823	901
		778	778
		510	447
		708	417
		508	686
		754	881
		767
Descriptive statistics	Sample size (n)	15 ALs	14 ALs
	Normalized mean	1	1.158
	Std. Deviation	0.2961	0.2971
Shapiro-Wilk normality test	W	0.9359	0.9214
	p value	0.3335	0.2302
Mann Whitney test	p value	0.2051

## Sheet: Fig. 2J
Source data for Leier & Foden et al. (2025)
Figure 2J
OSN class	Response to EB
Or42a	0.739
Or43b	0.701
Or42b	0.475
Or85a	0.422
Or67c	0.408
Or22a	0.402
Or9a	0.32
Or59c	0.314
Or67a	0.306
Or35a	0.302
Or47a	0.256
Or98a	0.255
Or85b	0.209
Or85c	0.148
Or45a	0.141
Or92a	0.135
Or19a	0.12
Or13a	0.109
Or59b	0.096
Or43a	0.091
Or33b	0.082
Or85f	0.073
Or49a	0.07
Or85d	0.063
Or94b	0.06
Or83c	0.06
Or59a	0.054
Or71a	0.046
Or7a	0.045
Or23a	0.044
Or74a	0.034
Or2a	0.025
Or10a	0.025
Or82a	0.02
Or45b	0.019
Or67b	0.017
Or1a	0.011
Or30a	0.01
Or22b	0.004
Or33a	0
Or49b	-0.002
Or94a	-0.01
Or88a	-0.018
Or65a	-0.021
Or47b	-0.04

## Sheet: Fig. 2K
Source data for Leier & Foden et al. (2025)
Figure 2K
Genotype		w; or22a-Gal4/+; UAS-mcd8::GFP/+
Odorant exposure (0-2 DPE)		Mineral oil	15% EB
Measurement		DM2 volume (μm3)	DM2 volume (μm3)
		784.94	1315.39
		783.87	1057.23
		1039.41	1333.34
		1080.28	883.25
		1023.85	1529.33
		995.26	1199.36
		1409.04	2208.84
		1282.58	1054.35
		1192.11	916.3
		891.95	1373.78
			1136.81
Descriptive statistics	Sample size (n)	10 ALs	11 ALs
	Normalized mean	1	1.215
	Std. Deviation	0.1944	0.3511
Shapiro-Wilk normality test	W	0.9556	0.8449
	p value	0.7349	0.0366
Mann Whitney test	p value	0.0986
