# Supplementary material for: Glia control experience-dependent plasticity in an olfactory critical period
Source: eLife. 2025 Jan 30;13:RP100989. doi: 10.7554/eLife.100989 (PMC11781797; doi:10.7554/eLife.100989)
Supplement: Figure 3—source data 1. [file elife-100989-fig3-data1.xlsx]

## Sheet: Fig. 3B
Source data for Leier & Foden et al. (2025)
Figure 3B
Genotype		w; or42a-mcd8::GFP/+; repo-Gal4/+
Odorant exposure (0-2 DPE)		Mineral oil	15% EB
Measurement		VM7 volume (μm3)	VM7 volume (μm3)
		1548.07	1123.33
		913.6	1067.81
		1251.84	1065.58
		1146.66	1161.57
		1406.75	142.5
		1761.96	1134.35
		1625.47	808.99
		1416.08	1148.96
		1245.61	1573.19
		1222.97	1242.33
		1943.62	935.33
		1388.36	1651.72
		1269.66	1415.98
		1456.19	997.04
		608.67	1032.12
		947.9
		675.21
		837.8
		713.58
		823.54
		1585.43
		1584.52
		1829.91
Descriptive statistics	Sample size (n)	23 ALs	15 ALs
	Normalized mean	1	0.8664
	Std. Deviation	0.3021	0.2747
Shapiro-Wilk normality test	W	0.9632	0.8794
	p value	0.5314	0.0465
Mann Whitney test	p value	0.1813

## Sheet: Fig. 3C
Source data for Leier & Foden et al. (2025)
Figure 3C
Genotype		w; or42a-mcd8::GFP/+; repo-Gal4/+
Odorant exposure (0-2 DPE)		Mineral oil	15% EB
Measurement		No. Brp puncta	No. Brp puncta
		933	560
		732	826
		487	671
		849	725
		546	129
		782	647
		1631	547
		954	527
		1042	642
		1274	593
		1195	579
		1169	908
		1053	485
		1136	876
		1480
		674
		620
		601
		1219
		946
		743
		459
		594
Descriptive statistics	Sample size (n)	23 ALs	14 ALs
	Normalized mean	1	0.6765
	Std. Deviation	0.346	0.2124
Shapiro-Wilk normality test	W	0.9496	0.935
	p value	0.2869	0.3577
Mann Whitney test	p value	0.0056

## Sheet: Fig. 3E
Source data for Leier & Foden et al. (2025)
Figure 3E
Genotype		w; or42a-mcd8::GFP/+; repo-Gal4/+
Odorant exposure (0-2 DPE)		Mineral oil	15% EB
Measurement		Mean firing rate (Hz)	Mean firing rate (Hz)
		1.80619	0.089481
		1.36326	0.083334
		0.864511	0.361238
		0.683334	0.016667
			0.133334
			0.166667
			0.15
Descriptive statistics	Sample size (n)	4 brains	7 brains
	Mean	1.179	0.143
	Std. Deviation	0.5072	0.1086
Shapiro-Wilk normality test	W	0.9463	0.8732
	p value	0.693	0.1981
Mann Whitney test	p value	0.0061

## Sheet: Fig. 3F
Source data for Leier & Foden et al. (2025)
Figure 3F
Genotype		w; or42a-mcd8::GFP/+; repo-Gal4/+
Odorant exposure (0-2 DPE)		Mineral oil	15% EB
Measurement		Interspike interval (ms)	Interspike interval (ms)
		451.7	1638.7
		677.3	3043.5
		533.6	1680.1
		496.1	2216.9
		272.3	1131.9
		782.5	4448.8
		608.9	5724.1
		488.5	5200.2
		655.7	3212.1
		547.4	3557.2
		543	5656.4
		337.6	4628.1
		899.5	6811.6
		564.2	3298.4
		422.3	3892.9
		533.7	5080.5
		474.4	5357.7
		611.7	4767.7
		263.2	3910.4
		843.2	5910.3
		630.3	3158.8
		404.9	4228.2
		665.7	2994.1
		509.5	3176.1
		483.8	3466.4
		539	3913.1
		662	1999.4
		288.6	1627.6
		499.3	2178.7
		804.5	1426.8
		583.3	1659.7
		588.4	1231.7
		423.5	1920
		508.5	3185.6
		665.4	4206.5
		550.8	4599.5
		613	1738
		502.7	4266.2
		440.8	2914.4
		441.1	946.6
		824	3700.5
		534.3	3626.1
		521.7	581.7
		675.3	303.9
		357.5	464.8
		249.2	999.4
		899.1	895.2
		468.9	753.4
		608	987.9
		539.8
		336.8
		666.1
		650.8
		449.3
		849.6
		1021.2
		648.9
		627.8
		1005.3
		669.3
		1030.2
		812.3
		902.1
		741.7
		482.6
		854.3
		752.8
		792.1
		821.6
		468.4
		550.9
		975.5
		839.1
		732.4
		547.8
		967.3
		537.1
		1085.6
		531.6
		687.9
		932.2
		591.4
		866
		407.9
		530
		849.7
		707.7
		466.1
		705.8
		722.2
		555.7
		854.8
		681.7
		392.2
		1632.2
		488.1
		988.7
		2587.5
		1086.4
		1326.7
		1160.6
		518.6
		1440.7
		987.9
		1543.4
		642.7
		1403.8
		1100
		712.8
		1231.7
		998.3
		1109.4
		429
		1469.7
		853.8
		1526.1
		1618
		763.3
		1418.9
		228.1
		467.8
		351.8
		1148.5
		319.8
		407.8
		822
		455.5
		530.8
		940.7
		679.2
		846.8
		484.4
		604.7
		791
		797.5
		673.8
		821.2
		577.3
		810.5
		729.2
		485
		958.1
		753.7
		546.4
		2336.4
		939.6
		611.1
		1942.4
		2288.1
		858.6
		1041.4
		957.9
		2265.4
		98.2
		723.4
		766.4
		5444.6
		4813
		79.3
Descriptive statistics	Sample size (n)	159 spikes	49 spikes
	Minimum	79.3	303.9
	25% Percentile	509.5	1633
	Median	669.3	3176
	75% Percentile	899.1	4247
	Maximum	5445	6812

## Sheet: Fig. 3G
Source data for Leier & Foden et al. (2025)
Figure 3G
Genotype		w; or42a-mcd8::GFP/+; repo-Gal4/+
Odorant exposure (0-2 DPE)		Mineral oil	15% EB
Measurement		Spike onset latency (ms)	Spike onset latency (ms)
		0.846154	0.840625
		0.85	0.95
		0.841667	0.74
		0.6775	0.8
			0.942857
			0.8
			0.4625
Descriptive statistics	Sample size (n)	4 brains	7 brains
	Mean	0.8038	0.7909
	Std. Deviation	0.08429	0.1641
Shapiro-Wilk normality test	W	0.6678	0.8522
	p value	0.0046	0.1288
Mann Whitney test	p value	0.7485

## Sheet: Fig. 3H
Source data for Leier & Foden et al. (2025)
Figure 3H
Genotype		w; or42a-mcd8::GFP/+; repo-Gal4/+
Odorant exposure (0-2 DPE)		Mineral oil	15% EB
Measurement		Afterhyperpolarization decay time constant (ms)	Afterhyperpolarization decay time constant (ms)
		103.837	270.787
		108.546	297.483
		85.9424	76.2599
		131.785	77.5898
			52.1233
			59.4927
			53.7992
Descriptive statistics	Sample size (n)	4 brains	7 brains
	Mean	107.5	126.8
	Std. Deviation	18.88	108.2
Shapiro-Wilk normality test	W	0.9753	0.6962
	p value	0.874	0.0034
Mann Whitney test	p value	0.3152
