# Supplementary material for: Glia control experience-dependent plasticity in an olfactory critical period
Source: eLife. 2025 Jan 30;13:RP100989. doi: 10.7554/eLife.100989 (PMC11781797; doi:10.7554/eLife.100989)
Supplement: Figure 4—source data 1. [file elife-100989-fig4-data1.xlsx]

## Sheet: Fig. 4D
Source data for Leier & Foden et al. (2025)
Figure 4D
Genotype		w; or42a-mcd8::GFP/+; repo-Gal4/+		w; or42a-mcd8::GFP/+; repo-Gal4/UAS-draper RNAi		w; or42a-mcd8::GFP/UAS-draper-I RNAi; repo-Gal4/+
Odorant exposure (0-2 DPE)		Mineral oil	15% EB	Mineral oil	15% EB	Mineral oil	15% EB
Measurement		VM7 volume (μm3)	VM7 volume (μm3)	VM7 volume (μm3)	VM7 volume (μm3)	VM7 volume (μm3)	VM7 volume (μm3)
		1296.08	417.105	1046.37	1146.4	1217.01	1176.6
		1118.65	127.29	1229.38	910.612	1376.12	863.571
		1364.26	963.399	1196.08	1237.39	1175.19	1892.18
		1208.94	796.578	1112.78	1317.9	1249.03	1714.04
		1194.1	957.563	1354.85	1220.11	1221.82	1728.26
		1030.04	317.527	1075.61	1233.2	1213	1958.15
		1177.28	39.4737	896.87	1333.72	1332.5	1802.52
		1035.06	28.2528	1028.12	1313.37	1331.22	1463.64
		1040.2	299.902	1259.86	1724.18	1231.38	1793.05
		997.154	293.951	1330.39	1607.29	955.716	1955.52
		1066.64	1105.03	1192.47	1242.52	1216.02	1649.41
		1948.4	852.602	1280.39	1097.3	1037.24	1439.99
		1293.3	366.903	1413.15	1275.83	1267.5	1406.87
		1271.13	566.256	1801.39	1211.04	1429.6	1185.68
		999.13	1048.97	1634.24	1390.96	1064.23	1310.06
		571.593	961.357	1580.78	1444.42	1116.94	1057.68
		956.969	1544.14	1026.45	735.449	1549.19	1072.26
		1325.73	1729.35	1295.88	1155.3	1533.54	1056.01
		841.393	1126.43	1303.95	1403	1061.26	1187.82
		934.295	1164.29	963.19	1191.17	979.839	1179.06
		1386.27	661.837	1167.07	471.141	870.81	1394.29
		1299.42	778.477	1258.76	1161.94	864.38	1261.49
		1170.6	966.339	993.331	1354.18	882.67	1041
		1269.57	905.315	1070.54	1036.84	763.33	1241.98
		1128.6	1124.19	1098.44	1084.2	986.68	1226.63
		1265.13	1139.94	1398.68	1455.08	713.05	871.355
		852.755	605.72	1336.87	1023.76	651.71	1511.14
		995.874	440.336	1414.98	1344.14	982.12	1158.7
		979.87	883.688	1167.68	1223.79	1154.03	1396.01
		1329.14	966.436	964.45	1100.48	986.66	1601.47
		1091.85	213.464	1221.94	1294.28	1209.17	1164.93
		923.335	327.188	1008.07	1102.75	1071.47	1053.8
		1006.94	178.858	975.967	1341.63	1015.27	1215.8
		1068.63	362.48	874.585	1626.79	1117.85	1151.45
		1134.66	788.03	872.942	1204.07	978.042	1790.65
		930.481	547.335	895.942	1310.07	907.519	1347.3
		1197.68	494.898	1003.5	1380.14	1548.13	1139.76
		838.482	746.701	998.098	1638.77	1695.56	1219.29
		1155.24	1015.01	1020.16	748.289	1404.53	927.5
		1382.44	1145.59		1324.53	1002.73	911.24
		1012.2	708.96		1303.38	947.125	1120.3
		1073.15	1095.88		885.286	1293.1	1253.33
		1538.95	850.898		1227.89	950.98	796.55
		1560.22	660.026		1221.59	960.01	800.53
		618.692	1022.46		923.805	1239.75	1304.74
		743.125	794.76		858.495	780.444	666.922
		1340.53	880.346		485.124	1035.64	1458.77
		989.503	284.165		1034.23	794.864	1415.22
		862.126	607.485		911.871	1081.94	1683.55
		1036.68	442.201		921.206	1185.97	1730.79
		864.293	203.068		1212.9	968.542	1494.99
		1146.39	333.283		1224.84	1236.65	1519
		1285.38	251.122		1212.51	794.575	1683.77
		1200.72	102.522		1148.4	1180.64	1777.9
		1371.09	344.015		759.053	818.903	1106.43
		1173.27	312.323		869.373	1073.46	1678.07
		1324.48	293.659		984.048	972.268	1813.16
			650.592		1185.66	808.474	1342.33
			201.062		528.33	952.739	1733.26
			368.129		1313.66	720.382
			185.675		1111.04
			158.389		1248.74
			145.511		1050.63
			97.668		1199.66
			495.957		1726.16
			665.657		551.001
			850.277		1311.61
			1054.66		732.553
					593.268
					902.06
					1311.61
					732.553
					1863.97
					2187.22
					1061.39
					1939.07
					1567.64
					1392.73
					837.743
					1387.77
Descriptive statistics	Sample size (n)	57 ALs	68 ALs	39 ALs	80 ALs	60 ALs	59 ALs
	Normalized mean	1	0.6053	1.074	1.077	0.9739	1.161
	Std. Deviation	0.2181	0.3332	0.2459	0.2807	0.2826	0.2782
Shapiro-Wilk normality test	W	0.9761	0.9731	0.9576	0.9857	0.9176	0.9651
	p value	0.3164	0.1483	0.1481	0.5133	0.0006	0.0887
Kruskal-Wallis test	p value	<0.0001
Dunn's multiple comparisons test	Comparison	n/A	Mineral oil treated, w; or42a-mcd8::GFP/+; repo-Gal4/+	Mineral oil treated, w; or42a-mcd8::GFP/+; repo-Gal4/+	15% EB treated, w; or42a-mcd8::GFP/+; repo-Gal4/+	Mineral oil treated, w; or42a-mcd8::GFP/+; repo-Gal4/+	15% EB treated, w; or42a-mcd8::GFP/+; repo-Gal4/+
	Mean rank diff.		108.7	-24.46	-138	15.02	-166.7
	p value		<0.0001	>0.9999	<0.0001	>0.9999	<0.0001

## Sheet: Fig. 4E
Source data for Leier & Foden et al. (2025)
Figure 4E
Genotype		w; or42a-mcd8::GFP/+; repo-Gal4/+		w; or42a-mcd8::GFP/+; repo-Gal4/UAS-draper RNAi		w; or42a-mcd8::GFP/UAS-draper-I RNAi; repo-Gal4/+
Odorant exposure (0-2 DPE)		Mineral oil	15% EB	Mineral oil	15% EB	Mineral oil	15% EB
Measurement		No. Brp puncta	No. Brp puncta	No. Brp puncta	No. Brp puncta	No. Brp puncta	No. Brp puncta
		688	438	926	811	1275	822
		888	887	1144	943	1165	1227
		925	820	823	1193	1183	1382
		868	49	1012	1265	1243	1360
		729	361	1013	1053	1188	1396
		845	820	931	1088	1177	1012
		928	692	822	1307	1246	662
		895	194	1294	1235	1269	1057
		850	848	951	1272	849	1276
		861	418	1072	1517	982	1110
		1456	42	1054	1153	903	1310
		739	392	1223	1111	682	1231
		928	1069	971	1157	751	938
		953	505	726	1084	815	1094
		477	885	1562	1326	877	1109
		742	775	1396	1294	726	978
		675	1308	1184	1041	878	953
		646	1356	845	823	872	1003
		1031	835	1124	841	552	1167
		996	1036	1074	1175	571	1075
		1204	694	1265	1019	677	1178
		724	623	956	1193	897	885
		1130	700	1127	1046	748	900
		999	780	1253	1154	916	1002
		1080	803	1167	851	784	759
		727	763	1021	596	711	928
		1060	394	788	847	805	1048
		941	480	930	1083	712	1303
		887	891	787	853	691	960
		862	951	701	972	937	1246
		1050	314	839	1078	870	1151
		1140	463	719	1403	774	980
		949	308	783	1129	1115	1239
		1173	502	610	1148	913	1818
		784	1163	703	969	1139	1249
		877	629	793	970	803	1364
		890	597	718	1121	1464	1324
		797	286	736	1416	1727	1261
		751	162	702	764	1427	598
		786	768		1010	995	533
		1231	182		1089	787	705
		996	506		1148	1094	842
		1248	624		985	592	531
		677	441		1170	575	542
		1322	475		862	537	516
		1249	427		1296	823	980
		560	316		1053	757	970
		641	590		597	835	904
		816	221		891	788	1063
		839	714		458	534	1006
		671	454		902	948	1084
		784	709		956	652	1162
		939	600		817	627	822
		858	119		514	760	1096
		738	284		637	611	1076
		837	330		771	729	1330
		1040	363		616	793	1004
			236		820	647	1298
			103		872	708	937
			314		823	564
			481		398
			274		879
			280		763
			158		807
			514		1200
			640		508
			54		879
			692		589
					706
					549
					879
					589
					1271
					1478
					1282
					774
					1054
					963
					562
					909
Descriptive statistics	Sample size (n)	57 ALs	68 ALs	39 ALs	80 ALs	60 ALs	59 ALs
	Normalized mean	1	0.6053	1.074	1.077	0.9739	1.161
	Std. Deviation	0.2181	0.3332	0.2459	0.2807	0.2826	0.2782
Shapiro-Wilk normality test	W	0.9761	0.9731	0.9576	0.9857	0.9176	0.9651
	p value	0.3164	0.1483	0.1481	0.5133	0.0006	0.0887
Kruskal-Wallis test	p value	<0.0001
Dunn's multiple comparisons test	Comparison	n/A	Mineral oil treated, w; or42a-mcd8::GFP/+; repo-Gal4/+	Mineral oil treated, w; or42a-mcd8::GFP/+; repo-Gal4/+	15% EB treated, w; or42a-mcd8::GFP/+; repo-Gal4/+	Mineral oil treated, w; or42a-mcd8::GFP/+; repo-Gal4/+	15% EB treated, w; or42a-mcd8::GFP/+; repo-Gal4/+
	Mean rank diff.		108.7	-24.46	-138	15.02	-166.7
	p value		<0.0001	>0.9999	<0.0001	>0.9999	<0.0001

## Sheet: Fig. 4G
Source data for Leier & Foden et al. (2025)
Figure 4G
Genotype		w; or42a-mcd8::GFP/+; repo-Gal4/UAS-draper RNAi
Odorant exposure (0-2 DPE)		Mineral oil	15% EB
Measurement		Mean firing rate (Hz)	Mean firing rate (Hz)
		4.60002	3.63335
		2.20001	2.05001
		2.60001	2.85001
		3.10001	3.00001
		2.13334	0.983337
		3.45001	3.38334
Descriptive statistics	Sample size (n)	6 brains	6 brains
	Normalized mean	3.014	2.65
	Std. Deviation	0.9298	0.9803
Shapiro-Wilk normality test	W	0.9079	0.9103
	p value	0.4228	0.4383
Mann Whitney test	p value	0.6991

## Sheet: Fig. 4H
Source data for Leier & Foden et al. (2025)
Figure 4H
Genotype		w; or42a-mcd8::GFP/+; repo-Gal4/UAS-draper RNAi
Odorant exposure (0-2 DPE)		Mineral oil	15% EB
Measurement		Interspike interval (ms)	Interspike interval (ms)
		325.9	362.7
		239.4	244.1
		424.6	203.8
		429.5	187.5
		325.9	178.1
		368.5	226.9
		502.6	190.6
		384.6	221.2
		329.4	242.8
		205	210.6
		421	387.5
		215.8	253.5
		482.7	255.5
		406.6	245
		478.2	267.4
		191	203.9
		231.7	179.1
		149.8	227.3
		222.8	179.7
		208.1	230.6
		291.8	278.5
		222.3	245.9
		178.9	188.1
		248.9	238
		303.8	203.3
		382.3	266.2
		165.8	191.4
		188.2	228
		179.3	202.4
		384	221.1
		313.7	212.3
		300.8	188.2
		303.6	192.1
		191	206
		176.7	220.5
		733.3	240.7
		566.8	152.4
		878.4	196.5
		558	252.5
		575.8	170
		359.3	223.8
		208.4	192.7
		439.9	209.4
		344.6	199
		332.7	248.5
		397.1	183.5
		313.3	152.6
		283.5	233
		286.6	178.8
		448.1	230
		251.6	236.3
		372	221.7
		334.5	195.4
		668	227.9
		311.5	198.8
		461.2	189.9
		425.8	270.5
		330.9	230.1
		186.8	251.8
		240.9	297.8
		406.6	215
		484.8	271.2
		361.8	259.1
		404.8	226.8
		245.6	273.5
		211.2	173.1
		202.8	215.4
		223.8	317.4
		133.5	204.5
		208.7	232.1
		1.1	196.1
		167.4	349.2
		179.5	260.7
		217	286.9
		309.6	236
		405.8	257.9
		285.1	193.2
		246.8	275.8
		305.8	263.2
		355.5	220.6
		457.8	273.6
		459.5	260.8
		318.7	307.6
		241.5	232.9
		111.5	240.4
		175	235.2
		277.9	282.3
		149.3	263.8
		4.5	315.8
		164.4	221.5
		216.8	242.5
		1.1	236.5
		234.8	351.9
		165.1	269.5
		101.7	259.8
		13.8	239.2
		229.3	272.8
		189.1	399.9
		272.9	249.4
		205.7	254.4
		0.8	394.5
		142.7	286.2
		1.7	262.3
		69.6	303.2
		219.5	250.2
		18	248.6
		98	269.2
		8.9	284
		97.6	288.2
		78.5	308
		38.3	229.7
		170.6	275.8
		7.5	257.4
		165.2	415.8
		215.7	220.5
		170.5	325.9
		32.5	321.7
		316.7	304.1
		1.9	256.3
		180.6	357.1
		1.1	320.4
		163.4	359.4
		176	304.8
		16	358.2
		1.6	303.3
		90.7	231.1
		16.6	324.7
		3	262.2
		248.2	305.4
		3.3	506.1
		1.5	257
		3.7	338.2
		117.3	410.1
		1.9	325.1
		2.2	340.5
		2.5	418.1
		0.7	330.2
		126.7	358.3
		2.3	366.3
		6.1	376.3
		3.2	317.6
		274.5	267.5
		55.4	293.7
		12	275.5
		13.1	374.2
		9.8	309.2
		51.6	287.4
		6.6	318.6
		2.4	339.5
		1.6	326.6
		45.1	295.4
		5.4	276.7
		66.5	304.4
		172.1	359.4
		27.1	297.7
		8.9	315.6
		2.8	321.4
		1.5	272.1
		51.7	262.3
		43.2	343.1
		2.1	283.7
		10.7	290.1
		140.9	293.9
		2.2	308.3
		99	341.8
		2.5	259.2
		7.3	246.3
		124	306.8
		193.2	308.7
		42.8	237.9
		8.1	384.2
		40.4	276.4
		1.5	223.5
		2	311.9
		30.1	263.3
		2.8	280.1
		37.9	255.9
		0.5	266.3
		0.9	254.8
		115.8	322.7
		0.9	304.7
		9.2	290.2
		7.8	261
		3.2	388.5
		0.2	250.5
		53.4	318.3
		28.1	207.9
		1.5	320.2
		22.9	383.9
		13	232.1
		2.5	272.7
		48.4	245.2
		22.9	276.9
		48.7	378.7
		4.3	282.3
		61.1	244.6
		4.4	292.2
		8.4	316.8
		4.1	264.3
		2.9	280.4
		0.8	326.8
		1.9	267.8
		1	255.9
		9.8	301.9
		8.4	272.9
		67.5	289.9
		4.8	298.6
		10.5	247.3
		31.3	301.7
		11.1	313.1
		4.7	360
		11	310.3
		4.7	263.1
		0.9	306.1
		4.5	295.9
		4.6	266.9
		4.5	268.4
		1.8	391.2
		6.7	309.2
		8.1	373.5
		10.8	556.7
		14.7	398.1
		1.1	427.7
		8.6	403.9
		0.6	340.3
		10.9	401.4
		2.1	355.8
		4.3	339.4
		5.2	411.6
		40.9	281.6
		9.2	477.3
		0.7	363.4
		3.1	326.6
		4.3	494
		6.7	454.7
		4.5	339.1
		1.7	486.3
		10.6	444.7
		1.5	477.7
		4	353.4
		139.6	378.1
		187.9	408.1
		10.2	386
		90.7	499.2
		41.5	381.8
		2.6	373.7
		13.8	414.8
		2.7	409.5
		84.8	350.6
		10.7	411.4
		43.7	342
		323.3	442.2
		6	428.6
		40.3	434.8
		4.2	436.2
		8.8	637.3
		1.5	436.7
		2.8	560
		45.7	517.3
		33.6	333.3
		1.8	721.6
		9.1	397.9
		1.4	443.3
		2.7	500.1
		1.3	559.8
		6.7	431.6
		1.3	471.8
		3.3	409.3
		597	484.3
		329.2	423.9
		461.5	573.1
		390.1	369.3
		314.9	374.4
		732.2	367.2
		1050.5	436.1
		459.8	452
		424.4	728.5
		360.2	355.9
		368	345
		437.4	578.5
		387.2	553.1
		486	576.8
		468.8	739
		662.4	505.5
		475.1	613.5
		563.5	661.2
		384.4	454.2
		381	406.6
		412.4	420.7
		629.2	801.3
		423.9	488.2
		466.6	433.4
		469.1	434
		520	914.2
		360.5	371.1
		473.8	463.2
		395.7	324.9
		439.4	355.7
		919.6	497.7
		371.1	531.4
		407.6	549.8
		555.5	499.1
		357.2	520.8
		413.1	577.4
		586.5	481.7
		456.5	503.7
		464.8	641.4
		412.3	377.4
		469.4	468.1
		514.8	467.7
		568.7	418.5
		454.3	372
		703.3	1124.8
		511.4	529.1
		499.6	538.7
		667.6	514.9
		646.3	469.5
		434	429.5
		468.1	472.9
		500.4	555.8
		528.5	625.5
		661.4	450.5
		659.6	604.6
		566.3	499.9
		434.4	463.5
		440.9	653.4
		542.7	566.7
		426.4	743.7
		576.3	606.9
		468.2	634
		445.8	564
		711.7	473.6
		533.8	573.5
		458.5	372.9
		546.7	918.4
		475.3	558.2
		457.3	892
		554.9	467.8
		550.2	475.8
		500.6	364.1
		593.9	409.6
		493.4	361.5
		438.6	361
		759.6	267.8
		453.6	300
		572.5	335.2
		476.7	407.1
		416.2	731.5
		583.3	368.3
		431.2	405.8
		442.2	344
		553.7	303.2
		407.7	332.7
		554.2	512.2
		325.6	295.5
		392.9	355.5
		390.4	419.2
		289.1	404
		406.4	390.3
		314.8	410.8
		360.5	361.2
		353.7	310.6
		456.1	340.5
		455.6	424
		327.2	304.6
		376	322.6
		275.3	376.2
		505	319.3
		348.7	333.3
		372.3	345
		318.2	293.5
		465.9	339.2
		329.7	262.8
		414.5	269.1
		297.4	259.6
		443.2	511.1
		392.4	345.9
		321.9	297
		340.4	295
		331.8	458.8
		385.5	324.4
		463.5	297
		445	278.4
		374.6	351
		428.4	280.9
		415.9	271.8
		411.1	247.8
		420.3	432.2
		381.8	273
		375.7	287.6
		325.9	319.5
		363.3	305.1
		517.7	300.4
		284.5	306.8
		336.9	376.9
		346.2	317.8
		354.8	308.9
		403.5	271.7
		343.5	278.3
		380.9	278.5
		346	266.4
		353.6	410.9
		398.6	286.6
		372.7	291.1
		435.6	337.3
		337.6	289.4
		357.1	379.7
		288.9	253.1
		323.7	281.1
		328.4	293.9
		355.3	326.1
		499.6	457.8
		287.8	263.6
		416.8	204.5
		331.4	495.5
		359.2	318.2
		357	291.1
		299.2	340.8
		333.2	345.8
		400.7	354
		321.2	468.3
		328.3	361.9
		323.4	335.1
		360.4	285.9
		383	252
		305.9	370.2
		438.8	405.7
		509.1	515.4
		348.1	291
		322.6	353.1
		359.3	275
		412.9	269.9
		369.3	391.4
		371.6	350.8
		453.7	327.5
		379	503
		323.6	379.2
		351.7	486.6
		631.1	354.6
		432.7	278.5
		336.1	461.3
		344.1	369.9
		504	281.9
		355.3	366.3
		571.3	296
		434.8	277.7
		376.7	266
		375	311.7
		542.2	258.5
		416.5	470.2
		450.9	301.2
		586.3	441.4
		344.2	331.7
		305.7	291.9
		524.4	284.3
		449.7	303.1
		391	354.2
		513.5	385.3
		614.3	455.2
		576.3	303.8
		482.2	281.3
		398.1	404.7
		304.3	317.7
		415.3	357
		415.4	328
		494.8	289.2
		413.7	434.2
		466.7	396.2
		489.3	374.6
		361	310.2
		465.9	373
		508.4	369.7
		357.7	346.9
		286.4	298.8
		573.1	316.7
		499.6	347.6
		528.4	327.8
		433.4	284.3
		375.3	322.4
		533	408.4
		349	353.1
		353.2	373.3
		382.7	341.5
		324.9	393.7
		355.2	972.1
		307.1	262.1
		333.4	350.3
		350.2	347.1
		374.2	387.3
		383	313.7
		379.1	290.9
		456.1	349.1
		439.5	466.3
		385.8	298.7
		494.6	326.6
		365.6	328.1
		399	260.6
		275.6	264.7
		433.4	344.6
		335.8	385.9
		296	271.6
		438.9	317.5
		361.6	288.8
		305.3	362
		358.9	282.7
		348.7	345.5
		325.1	264.1
		473.8	318.2
		458.8	269.9
		511.8	397.1
		321.1	244.8
		277.2	420.2
		384.1	281.3
		358.5	305.8
		378	295.1
		456.2	450.7
		337.2	311
		322.9	416.9
		271.5	551.1
		370.9	302.3
		509	273.7
		360.5	409.2
		310.1	257.1
		280.7	313.9
		411.4	532.6
		390.8	217.5
		293.8	360.6
		295.9	369.7
		415.6	277.6
		341.3	264.8
		273.3	280.9
		362	470.8
		339.1	287.1
		318.6	291.1
		259.9	372.6
		331.7	262.3
		448	285.2
		340	262.2
		268.4	412.6
		303.2	280.1
		475.7	311.4
		284.8	299.2
		300.6	292.6
		267.7	337.8
		359.2	295.8
		386.9	357.3
		290.5	345.8
		328.1	289.3
		394.9	314.2
		279.8	271.9
		379.7	310.7
		275.7	367.8
		543.5	265.3
		383.7	277.2
		356.5	414.5
		373.2	311.3
		362.9	337.1
		332	455.4
		305.6	346.9
		350.1	283
		337.8	311.9
		283.7	319.4
		269.4	301
		370.5	275.6
		308.1	326.4
		305.9	321.3
		368.2	303.9
		547.3	417.8
		355.8	285.3
		380.4	281.5
		353.1	351.5
		330.7	587.2
		305.5	363.4
		279.2	403.3
		281.4	289.5
		300.4	257.7
		277	280.8
		241.9	360.6
		333.8	307.5
		316.8	305.1
		284	342.9
		309	323.7
		612.5	410.2
		267.2	222.6
		345.4	299.3
		352	280.6
		299.4	358.8
		257.3	440.8
		351.4	376.9
		276.9	243.6
		379.1	340.6
		279.8	293.4
		267.9	371.5
		278.7	312
		321.3	339.8
		298.2	309.5
		344.6	463.1
		261	315
		287.5	329.1
		316.8	320.8
		318.3	308
		319.8	234.9
		288.5	289.3
		363.3	435.3
		313.7	289.4
		295.1	358.5
		342	416
		306.1	251.4
		323.4	424.1
		407.4	270.1
		371.7	285.7
		324.1	281.8
		282.7	333.4
		370.3	366.2
		311.9	544.2
		337.3	259.7
		391.9	274.2
		300.6	281.5
		446.8	331.1
		307.6	398.8
		298.7	288.4
		393.1	306.1
		253.3	301.4
		287.4	356.3
		378.9	323.3
		305.8	278.8
		305.5	307.6
		317.2	295.9
		252.9	370.7
		247.7	287.4
		409.6	470.2
		343.1	354.6
		354.6	317.2
		271.2	322.8
		283.5	261.8
		262.5	239.9
		265.8	284.6
		297.9	346.2
		322.6	339.9
		302.1	383.8
		328.2	281.1
		286.6	301.5
		351.6	358.2
		309.7	312.3
		295	335.7
		403.8	415.1
		342.8	380
		353.8	327.2
		264.4	251
		284.3	239.7
		307.7	329.9
		335.9	301.8
		243.1	300.8
		324.2	333.8
		341.4	317.2
		314.3	276.5
		303.6	300.1
		295.7	343.7
		265.9	319.2
		210.6	298.2
		411.1	384.4
		327.1	297.9
		358.3	344.8
		319.8	356.4
		333.8	307
		269.3	240.7
		321.4	335
		310.3	311
		339	395.3
		336.2	319.3
		295.8	304.6
		344.7	328
		357.5	239.3
		253.8	307.4
		276.1	345.9
		331	399.2
		391.2	465
		312.8	289.4
		574.6	282.5
		352.3	209.9
		395.1	268.9
		271.5	305.8
		269.3	274.8
		390.2	349.7
		309.2	296.7
		322.1	360.6
		308.1	344
		375.6	771.3
		316	278.2
		293.7	337.9
		359.6	314.1
		238.5	336.3
		396	305.4
		275	592.8
		288.2	291.8
		327.9	1555.4
		250	326.1
		265.7	310.3
		290.2	1830.3
		325.5	421.8
		396.1	285.3
		367	320.7
		298.2	951.8
		328.2	975
		223.1	951.3
		368.3	285.1
		296.5	1109.8
		317.4	328
		350.7	308.4
		320.4	316.7
		318.6	332.6
		330.2	324.1
		296.3	378.2
		395.2	362.5
		259.4	303.8
		272.4	744.4
		323.4	1382.5
		305.3	655.8
		235.2	537.5
		332.3	775.9
		288.9	893.6
		404.4	476.8
		381.7	1074.1
		349.7	407.9
		387.1	383.6
		340.9	1445.2
		307.9	2150.2
		266.3	952.7
		268.7	1471.1
		384.6	691.2
		456.8	1290.6
		339.2	2000
		370.2	1426.8
		297.9	4732.3
		300.6	853.1
		264.6	3702.1
		304.1	1973.6
		295.7	3089.6
		435	1318.9
		372.5	1370.7
		250.4	1147.1
		319.8	516.7
		246.8	1570
		393	1441.3
		216.3	2974.6
		320.9	1031
		379.3	268.7
		541.8	263.2
		263.3	347.4
		266	315.4
		350.1	261.8
		281.9	742.9
		267.9	276.5
		234.1	230.3
		697	309.6
		300.5	258.9
		263.3	251.3
		314.9	268.5
		355.3	319
		295.8	267.3
		286	249.1
		238.3	349.9
		306.7	264.9
		718.9	288.2
		226.5	279.6
		789.4	270.7
		671	231.4
		320.6	292.5
		368.4	303.4
		273.9	305.1
		238.2	258
		364.9	309.7
		619.3	273
		617.2	311.2
		224.9	343.8
		575.8	308
		275.6	282.1
		273.3	287.6
		267.6	278.3
		313.7	249.8
		340.9	250.3
		266.2	275.9
		447	283.9
		289.9	292.8
		312.7	262.7
		271	367.2
		297.9	616.2
		224.5	278.6
		537.4	275.1
		336.8	551.9
		320.4	270.2
		292.2	290.2
		632.6	346.5
		567.1	290.5
		468.7	258.7
		312.2	322.8
		367.2	319.5
		315.6	337.5
		350.6	268
		331.5	293.7
		625.4	332.9
		307.8	374.3
		312.8	416.9
		674.1	285.7
		625.2	264.6
		339.6	268
		705.7	265.8
		269.8	285.6
		301	303.8
		439.7	280.4
		296.8	274
		333.7	294.7
		352.4	343.6
		275.7	266.5
		313.4	314.6
		290.6	302.2
		300.6	259.2
		274.4	270.7
		321.5	267.5
		346.7	283.2
		312.3	293.9
		284.1	306.7
		655.2	260.1
		359.8	252.9
		1548.2	259.8
		372.1	250.6
		332.5	279.6
		301.8	291.5
		1203	293.7
		295.7	390.9
		271.5	269.7
		406.5	679.1
		321.4	303.3
		348.3	269.7
		324.4	280.6
		337.9	261.6
		317.9	306
		305.4	377.6
		1375	288.6
		377.8	310.1
		327.4	294.7
		346.3	298.8
		328.5	303.9
		338.9	279.8
		681	263.3
		337.5	315.5
		357.4	290
		339.6	293.3
		319.5	286
		629.9	296.3
		306.3	578.9
		263.3	287.9
		300.9	282.9
		778.8	281.4
		736.4	312.2
		301.3	604.7
		296.1	271.8
		317.1	301.2
		389.4	268.5
		305.4	286
		940.8	296.5
		310.5	260
		353.3	265.3
		1036.6	292.9
		321.5	437.1
		1162	295.2
		299.1	302.7
		577.4	329.9
		325.3	281.2
		564.4	295.4
		5055.7	283
		605	299.8
		2101.3	274.9
		285.2	262.6
		307.4	303.8
		269.3	286.1
		275.4	344.5
		234.5	280.7
		277.6	280
		279.9	305.6
		295.9	281.4
		252.6	275.8
		278.4	242.1
		262.4	314
		283.8	258.3
		304.3	274.1
		254.6	276.6
		312.9	258.9
		261.3	304.1
		245.9	291.7
		281.8	310.6
		280.6	245.6
		231.5	255.2
		246.1	290.8
		249.4	299.4
		279.6	330.3
		278.3	271.1
		291.5	243.2
		278.9	283
		285.5	269.4
		254.6	285.7
		262.2	275
		357	272.8
		301.3	250.7
		266.6	257.8
		792.4	249.9
		271.1	247.7
		279.2	269.6
		246.4	259.3
		263.9	271.8
		234	259.2
		236.7	274.4
		586.9	293.8
		267.6	280.1
		266.4	252.9
		497.4	274
		252.9	274.9
		269.3	299.7
		263.8	259.8
		242.4	247.9
		247.1	238.7
		247.8	267.6
		259.8	316.9
		268.6	248.9
		265.7	50
		231	282.8
		229	317.2
		262.8	271.5
		256.2	270.9
		285.2	298.6
		239.5	313.5
		233.3	266.9
		257.3	267.3
		261.5	257.4
		206	282.7
		227.2	257.4
		243.6	41
		307.3	254.2
		296	258.3
		294.1	269.5
		268.9	239.6
		387.1	271
		275.6	257.3
		301.4	275.7
		307.4	300.8
		293.1	244.6
		328.4	288.8
		320	280.1
		302.1
		300.9
		314.1
		270.8
		295.1
		251
		258.9
		276.9
		268.8
		270.5
		275.7
		315.1
		269.9
		254.8
		290.9
		289.6
		282.4
		329.4
		308
		286.4
		287.1
		294.7
		267.3
		267.9
		285.4
		385.9
		288.6
		272.6
		287.6
		271.1
		263.8
		308.5
		308.6
		255.6
		260.7
		250
		566.7
		276.7
		288.3
		343.5
		257.3
		310.7
		273.7
		249.5
		269.3
		276.2
		511.6
		285.4
		281.3
		250.8
		303.2
		279.3
		658.8
		240.9
		303.2
		268
		315.4
		267.6
		305.3
		276.7
		265.9
		265.7
		273.1
		301
		290.5
		249.1
		304
		604.7
		297.4
		306.1
		338.7
		273.7
		270.3
		282.4
		327.8
		283.5
		247.6
		316.1
		268.7
		270.1
		287.3
		299.7
		253.7
		236.1
		279.7
		320.9
		284.4
		256.7
		252.1
		351.7
		254.9
		250
		241.2
		376.4
		261.8
		252.6
		314.6
		307
		247.3
		260.3
		263.2
		260.6
		352
		310.6
		284.6
		249
		253.5
		270.5
		328.8
		393.5
		269.9
		219.4
		290.4
		281.1
		232.7
		223.3
		228.2
		214.9
		271.3
		285
		261.8
		269
		228.7
		303.5
		239.5
		287
		268
		274.3
		254.9
		357.1
		267.4
Descriptive statistics	Sample size (n)	1079 spikes	948 spikes
	Minimum	0.2	41
	25% Percentile	252.9	271.8
	Median	306.1	306.8
	75% Percentile	376.7	373.7
	Maximum	5056	4732

## Sheet: Fig. 4I
Source data for Leier & Foden et al. (2025)
Figure 4I
Genotype		w; or42a-mcd8::GFP/+; repo-Gal4/UAS-draper RNAi
Odorant exposure (0-2 DPE)		Mineral oil	15% EB
Measurement		Spike onset latency (ms)	Spike onset latency (ms)
		3.54167	1.0281
		1.05469	0.945
		0.953947	0.949704
		1.0522	1.05225
		1.02837	1.04912
		1.04828	1.04747
Descriptive statistics	Sample size (n)	6 brains	6 brains
	Normalized mean	1.447	1.012
	Std. Deviation	1.027	0.05076
Shapiro-Wilk normality test	W	0.5297	0.7541
	p value	<0.0001	0.0219
Mann Whitney test	p value	0.2403

## Sheet: Fig. 4J
Source data for Leier & Foden et al. (2025)
Figure 4J
Genotype		w; or42a-mcd8::GFP/+; repo-Gal4/UAS-draper RNAi
Odorant exposure (0-2 DPE)		Mineral oil	15% EB
Measurement		Afterhyperpolarization decay time constant (ms)	Afterhyperpolarization decay time constant (ms)
		55.7544	45.9532
		71.8788	59.3014
		57.4851	53.3544
		52.6994	52.4637
		117.382	179.976
		121.815	356.097
Descriptive statistics	Sample size (n)	6 brains	6 brains
	Normalized mean	79.5	124.5
	Std. Deviation	31.78	124.4
Shapiro-Wilk normality test	W	0.7861	0.7181
	p value	0.0439	0.0095
Mann Whitney test	p value	0.8182
