# Supplementary material for: Glia control experience-dependent plasticity in an olfactory critical period
Source: eLife. 2025 Jan 30;13:RP100989. doi: 10.7554/eLife.100989 (PMC11781797; doi:10.7554/eLife.100989)
Supplement: Figure 5—source data 1. [file elife-100989-fig5-data1.xlsx]

## Sheet: Fig. 5A
Source data for Leier & Foden et al. (2025)
Figure 5A
Genotype		w; or42a-mcd8::GFP/UAS-mcd8::RFP; alrm-Gal4/UAS-luciferase		w; or42a-mcd8::GFP/UAS-mcd8::RFP; alrm-Gal4/UAS-draper RNAi		w; or42a-mcd8::GFP/UAS-draper-I RNAi; alrm-Gal4/UAS-mcd8::RFP
Odorant exposure (0-2 DPE)		Mineral oil	15% EB	Mineral oil	15% EB	Mineral oil	15% EB
Measurement		VM7 volume (μm3)	VM7 volume (μm3)	VM7 volume (μm3)	VM7 volume (μm3)	VM7 volume (μm3)	VM7 volume (μm3)
		362.034	54.8455	371.614	62.5632	508.129	270.268
		1123.4	109.506	361.153	127.053	58.3258	172.488
		1159.22	72.3487	254.374	3.05824	293.003	621.319
		536.9	70.6636	270.699	39.5942	356.565	678.331
		454.409	48.7083	90.5169	105.929	186.48	524.787
		1015.73	65.4222	248.881	388.991	376.879	678.118
		621.664	325.57	275.66	19.2005	226.589	180.266
		220.239	115.973	363.454	14.157	219.034	280.043
		429.416	151.491		49.4461	277.669	93.4491
		479.483	283.318		68.0188	523.282	217.545
		594.568	208.441		7.82695	134.091	113.11
		586.043			3.57261	130.093	90.9396
		487.882			10.3001	203.931	32.7005
		393.133			0.683913	257.784	124.807
		393.616					365.496
		487.385					264.771
		492.862					193.226
		122.825					379.698
		119.154					47.3402
		280.071					56.2349
		347.608					24.1631
							242.001
							267.458
							60.6443
							77.8403
Descriptive statistics	Sample size (n)	21 ALs	11 ALs	8 ALs	14 ALs	14 ALs	25 ALs
	Normalized mean	1	0.2686	0.5482	0.1261	0.5256	0.4752
	Std. Deviation	0.5558	0.1878	0.1809	0.1992	0.266	0.3907
Shapiro-Wilk normality test	W	0.8688	0.8409	0.852	0.6297	0.9475	0.8633
	p value	0.0091	0.0325	0.0998	<0.0001	0.5225	0.0032
Kruskal-Wallis test	p value	<0.0001
Dunn's multiple comparisons test	Comparison	n/A	Mineral oil treated, w; or42a-mcd8::GFP/UAS-mcd8::RFP; alrm-Gal4/UAS-luciferase	Mineral oil treated, w; or42a-mcd8::GFP/UAS-mcd8::RFP; alrm-Gal4/UAS-luciferase	15% EB treated, w; or42a-mcd8::GFP/UAS-mcd8::RFP; alrm-Gal4/UAS-luciferase	Mineral oil treated, w; or42a-mcd8::GFP/UAS-mcd8::RFP; alrm-Gal4/UAS-luciferase	15% EB treated, w; or42a-mcd8::GFP/UAS-mcd8::RFP; alrm-Gal4/UAS-luciferase
	Mean rank diff.		41.13	18.39	15.78	20.83	-12.8
	p value		0.0006	>0.9999	>0.9999	0.3792	>0.9999

## Sheet: Fig. 5B
Source data for Leier & Foden et al. (2025)
Figure 5B
Genotype		w; or42a-mcd8::GFP/UAS-mcd8::RFP; alrm-Gal4/UAS-luciferase		w; or42a-mcd8::GFP/UAS-mcd8::RFP; alrm-Gal4/UAS-draper RNAi		w; or42a-mcd8::GFP/UAS-draper-I RNAi; alrm-Gal4/UAS-mcd8::RFP
Odorant exposure (0-2 DPE)		Mineral oil	15% EB	Mineral oil	15% EB	Mineral oil	15% EB
Measurement		No. Brp puncta	No. Brp puncta	No. Brp puncta	No. Brp puncta	No. Brp puncta	No. Brp puncta
		1032	276	930	45	261	525
		1560	318	1056	75	813	1074
		1077	303	909	15	1209	1110
		867	540	894	180	954	537
		849	1176	1176	1140	1248	651
		837	486	1602	123	1005	777
		894	237	636	345	924	1473
		1140	258	573	537	1254	1404
		1479	969		84	669	831
		912	708		366	963	1356
		1266	879		27	720	414
		1668			5.99999	735	558
		1596			12	885	834
		1131			90	912	966
		816					435
		1089					180
		1527					1056
		690					663
		1296					219
		753					138
		1251					1062
							363
							231
							903
							303
Descriptive statistics	Sample size (n)	21 ALs	11 ALs	8 ALs	14 ALs	14 ALs	25 ALs
	Normalized mean	1	0.4948	0.8602	0.1925	0.7934	0.6394
	Std. Deviation	0.2668	0.2904	0.2857	0.2744	0.2315	0.3508
Shapiro-Wilk normality test	W	0.9354	0.876	0.9284	0.6972	0.9234	0.9554
	p value	0.1764	0.0926	0.5018	0.0003	0.2461	0.3307
Kruskal-Wallis test	p value	<0.0001
Dunn's multiple comparisons test	Comparison	n/A	Mineral oil treated, w; or42a-mcd8::GFP/UAS-mcd8::RFP; alrm-Gal4/UAS-luciferase	Mineral oil treated, w; or42a-mcd8::GFP/UAS-mcd8::RFP; alrm-Gal4/UAS-luciferase	15% EB treated, w; or42a-mcd8::GFP/UAS-mcd8::RFP; alrm-Gal4/UAS-luciferase	Mineral oil treated, w; or42a-mcd8::GFP/UAS-mcd8::RFP; alrm-Gal4/UAS-luciferase	15% EB treated, w; or42a-mcd8::GFP/UAS-mcd8::RFP; alrm-Gal4/UAS-luciferase
	Mean rank diff.		34.14	9.408	19.63	13.13	-9.305
	p value		0.0102	>0.9999	>0.9999	>0.9999	>0.9999

## Sheet: Fig. 5C
Source data for Leier & Foden et al. (2025)
Figure 5C
Genotype		w; or42a-mcd8::GFP/UAS-mcd8::RFP; GMR56F03-Gal4/UAS-luciferase		w; or42a-mcd8::GFP/UAS-mcd8::RFP; GMR56F03-Gal4/UAS-draper RNAi		w; or42a-mcd8::GFP/UAS-draper-I RNAi; GMR56F03-Gal4/UAS-mcd8::RFP
Odorant exposure (0-2 DPE)		Mineral oil	15% EB	Mineral oil	15% EB	Mineral oil	15% EB
Measurement		VM7 volume (μm3)	VM7 volume (μm3)	VM7 volume (μm3)	VM7 volume (μm3)	VM7 volume (μm3)	VM7 volume (μm3)
		779.01	114.69	666.91	531.69	765.76	262.72
		456.71	105.49	596.84	634.59	482.35	383.32
		838.67	285.76	632.57	310.95	550.14	108.99
		529.24	171.43	718.05	325.13	612.9	319.09
		555.13	31.16	686.93	1045.45	472.35	428.28
		502.96	125.51		1035.77	494.47	418.8
			261.81		929.62	247.81	421.51
			90.9		893.76	367.08	540.86
			83.37		978.92	338.5	448.24
			87.17		658.37	489.6	528.05
			260.77		924.47	211.03	359.24
			389.94		973.65	147.8	469.47
			590.36		525.71	733.34	115.99
			590.83		676.93	698.84	359.08
			559.69		443.46
			88.97		381.74
			101.64		349.42
			598.84		525.18
			590.23		642.56
			95.95		358.29
			59.02		528.11
			137.36		327.72
			36.39		246.68
			49.28
			130.42
			138.07
			220.83
			338.04
			88.05
Descriptive statistics	Sample size (n)	6 ALs	29 ALs	5 ALs	23 ALs	14 ALs	14 ALs
	Normalized mean	1	0.3629	1.082	1.015	0.7739	0.6044
	Std. Deviation	0.2594	0.3127	0.07722	0.4346	0.3166	0.2159
Shapiro-Wilk normality test	W	0.8446	0.7914	0.9878	0.904	0.9603	0.9033
	p value	0.1422	<0.0001	0.9716	0.0306	0.7273	0.1261
Kruskal-Wallis test	p value	<0.0001
Dunn's multiple comparisons test	Comparison	n/A	Mineral oil treated, w; or42a-mcd8::GFP/UAS-mcd8::RFP; GMR56F03-Gal4/UAS-luciferase	Mineral oil treated, w; or42a-mcd8::GFP/UAS-mcd8::RFP; GMR56F03-Gal4/UAS-luciferase	15% EB treated, w; or42a-mcd8::GFP/UAS-mcd8::RFP; GMR56F03-Gal4/UAS-luciferase	Mineral oil treated, w; or42a-mcd8::GFP/UAS-mcd8::RFP; GMR56F03-Gal4/UAS-luciferase	15% EB treated, w; or42a-mcd8::GFP/UAS-mcd8::RFP; GMR56F03-Gal4/UAS-luciferase
	Mean rank diff.		41.66	-9.167	-37.91	13.83	-15.76
	p value		0.0066	>0.9999	<0.0001	>0.9999	>0.9999

## Sheet: Fig. 5D
Source data for Leier & Foden et al. (2025)
Figure 5D
Genotype		w; or42a-mcd8::GFP/UAS-mcd8::RFP; GMR56F03-Gal4/UAS-luciferase		w; or42a-mcd8::GFP/UAS-mcd8::RFP; GMR56F03-Gal4/UAS-draper RNAi		w; or42a-mcd8::GFP/UAS-draper-I RNAi; GMR56F03-Gal4/UAS-mcd8::RFP
Odorant exposure (0-2 DPE)		Mineral oil	15% EB	Mineral oil	15% EB	Mineral oil	15% EB
Measurement		No. Brp puncta	No. Brp puncta	No. Brp puncta	No. Brp puncta	No. Brp puncta	No. Brp puncta
		670	153	600	429	94	466
		980	160	583	450	681	374
		478	205	590	619	538	548
		494	324	725	477	567	371
		671	65	647	909	415	165
		572	173		1032	524	477
			108		834	164	554
			354		717	553	526
			107		673	558	474
			108		819	477	372
			393		972	294	408
			291		818	427	528
			540		471	266	182
			430		337	374	474
			96		380
			650		64
			168		687
			564		338
			584		524
			483		184
			148		469
			90		315
			183		365
			68
			76
			193
			218
			332
			145
Descriptive statistics	Sample size (n)	6 ALs	29 ALs	5 ALs	23 ALs	14 ALs	14 ALs
	Normalized mean	1	0.3966	0.9765	0.8695	0.6578	0.6563
	Std. Deviation	0.2859	0.2713	0.0919	0.3986	0.2611	0.1911
Shapiro-Wilk normality test	W	0.8567	0.8734	0.8342	0.9696	0.946	0.8529
	p value	0.1781	0.0024	0.1495	0.6802	0.5005	0.0243
Kruskal-Wallis test	p value	<0.0001
Dunn's multiple comparisons test	Comparison	n/A	Mineral oil treated, w; or42a-mcd8::GFP/UAS-mcd8::RFP; GMR56F03-Gal4/UAS-luciferase	Mineral oil treated, w; or42a-mcd8::GFP/UAS-mcd8::RFP; GMR56F03-Gal4/UAS-luciferase	15% EB treated, w; or42a-mcd8::GFP/UAS-mcd8::RFP; GMR56F03-Gal4/UAS-luciferase	Mineral oil treated, w; or42a-mcd8::GFP/UAS-mcd8::RFP; GMR56F03-Gal4/UAS-luciferase	15% EB treated, w; or42a-mcd8::GFP/UAS-mcd8::RFP; GMR56F03-Gal4/UAS-luciferase
	Mean rank diff.		45.26	-4.1	-31.61	25	-19.22
	p value		0.002	>0.9999	0.0003	0.7861	0.3799

## Sheet: Fig. 5 Supplement 1A
Source data for Leier & Foden et al. (2025)
Figure 5—figure supplement 1A
Genotype		w; or42a-mcd8::GFP/+; repo-Gal4/+		w; or42a-mcd8::GFP/+; repo-Gal4/UAS-draper RNAi		w; or42a-mcd8::GFP/UAS-draper-I RNAi; repo-Gal4/+
Odorant exposure (0-2 DPE)		Mineral oil	15% EB	Mineral oil	15% EB	Mineral oil	15% EB
Measurement		No. Brp puncta/μm3	No. Brp puncta/μm3	No. Brp puncta/μm3	No. Brp puncta/μm3	No. Brp puncta/μm3	No. Brp puncta/μm3
		0.530832	1.0501	0.884964	0.707432	1.04765	0.698623
		0.793814	6.96834	0.93055	1.03557	0.846583	1.42084
		0.678023	0.851153	0.688081	0.964126	1.00665	0.730375
		0.717985	0.0615131	0.909434	0.959861	0.995172	0.793447
		0.610502	0.376999	0.747684	0.863037	0.97232	0.807749
		0.820357	2.58246	0.865556	0.882258	0.970322	0.516814
		0.788258	17.5307	0.916521	0.979966	0.935085	0.367264		Descriptive statistics	Sample size (n)	1079 spikes	948 spikes
		0.864684	6.86658	1.25861	0.940329	0.953261	0.722172			Minimum	0.2	41
		0.817151	2.82759	0.754846	0.737742	0.68947	0.711637			25% Percentile	252.9	271.8
		0.863458	1.42201	0.805779	0.943825	1.0275	0.567624			Median	306.1	306.8
		1.36503	0.038008	0.88388	0.927953	0.742587	0.794223			75% Percentile	376.7	373.7
		0.379286	0.459769	0.955178	1.01249	0.657514	0.854867			Maximum	5056	4732
		0.717544	2.91358	0.687118	0.906861	0.592505	0.666728
		0.749727	0.891823	0.403022	0.895099	0.57009	0.922677
		0.477415	0.843685	0.955796	0.953299	0.82407	0.846526
		1.29813	0.806152	0.883108	0.895861	0.64999	0.924665
		0.705352	0.847074	1.15349	1.41546	0.566748	0.888777
		0.487279	0.78411	0.652067	0.712369	0.568619	0.949802
		1.22535	0.74128	0.861996	0.59943	0.520137	0.982472
		1.06604	0.889813	1.11504	0.986425	0.582749	0.911743
		0.868518	1.0486	1.08391	2.16283	0.777437	0.844875
		0.557172	0.800281	0.759478	1.02673	1.03774	0.701551
		0.965317	0.724384	1.13457	0.772423	0.847429	0.864553
		0.786881	0.861579	1.17044	1.113	1.20001	0.806776
		0.956938	0.714292	1.06242	0.784911	0.794584	0.618769
		0.574645	0.669334	0.729974	0.4096	0.997125	1.06501
		1.24303	0.650466	0.589437	0.827342	1.23521	0.693516
		0.944899	1.09008	0.657253	0.80572	0.724962	1.12454
		0.905222	1.00827	0.673986	0.697015	0.598771	0.687674
		0.64854	0.984028	0.726839	0.883251	0.949669	0.778035
		0.961671	1.47097	0.686613	0.832896	0.719502	0.988042
		1.23465	1.41509	0.713244	1.27227	0.722372	0.929968
		0.942459	1.72204	0.802281	0.841514	1.09823	1.01908
		1.09767	1.3849	0.697474	0.705684	0.816747	1.57888
		0.690956	1.47583	0.805323	0.804771	1.16457	0.697512
		0.942523	1.1492	0.885102	0.740419	0.88483	1.0124
		0.743103	1.20631	0.715496	0.812237	0.945657	1.16165
		0.950527	0.383018	0.737403	0.864063	1.01854	1.03421
		0.650081	0.159604	0.688127	1.021	1.016	0.644744
		0.56856	0.670397		0.762535	0.992291	0.584917
		1.21616	0.256714		0.83552	0.830936	0.629296
		0.928109	0.461729		1.29676	0.846029	0.67181
		0.810943	0.733343		0.802189	0.622516	0.666625
		0.433913	0.668156		0.957768	0.598952	0.677051
		2.13677	0.464566		0.933098	0.433152	0.395481
		1.68074	0.537269		1.50962	1.05453	1.46944
		0.417745	0.35895		2.17058	0.730949	0.664944
		0.6478	2.07626		0.577241	1.05049	0.63877
		0.946498	0.363795		0.977112	0.728322	0.631404
		0.809314	1.61465		0.497174	0.450264	0.581238
		0.776357	2.2357		0.743672	0.978791	0.725089
		0.683886	2.12732		0.78051	0.527231	0.764977
		0.730523	2.38928		0.673809	0.789101	0.48819
		0.714571	1.16073		0.447579	0.643719	0.616458
		0.538258	0.825545		0.839204	0.74612	0.972497
		0.713391	1.0566		0.886846	0.679113	0.792577
		0.785214	1.23613		0.625986	0.815619	0.553729
			0.362747		0.691598	0.800273	0.966976
			0.51228		1.65048	0.743121	0.5406
			0.852962		0.626494	0.782918
			2.59055		0.358223
			1.72992		0.70391
			1.92425		0.726231
			1.61773		0.672691
			1.03638		0.695185
			0.961456		0.921959
			0.0635087		0.670169
			0.656136		0.804038
					1.19002
					0.608607
					0.670169
					0.804038
					0.681878
					0.675744
					1.20785
					0.39916
					0.672348
					0.691448
					0.67085
					0.655008
Descriptive statistics	Sample size (n)	57 ALs	68 ALs	39 ALs	80 ALs	60 ALs	59 ALs
	Minimum	0.38	0.04	0.4	0.36	0.43	0.37
	25% Percentile	0.665	0.6625	0.7	0.69	0.665	0.64
	Median	0.79	0.89	0.81	0.81	0.81	0.76
	75% Percentile	0.95	1.478	0.93	0.9575	0.9875	0.93
	Maximum	2.14	17.53	1.26	2.17	1.24	1.58
Kruskal-Wallis test	p value	0.1734

## Sheet: Fig. 5 Supplement 1B
Source data for Leier & Foden et al. (2025)
Figure 5—figure supplement 1B
Genotype		w; or42a-mcd8::GFP/UAS-mcd8::RFP; alrm-Gal4/UAS-luciferase		w; or42a-mcd8::GFP/UAS-mcd8::RFP; alrm-Gal4/UAS-draper RNAi		w; or42a-mcd8::GFP/UAS-draper-I RNAi; alrm-Gal4/UAS-mcd8::RFP
Odorant exposure (0-2 DPE)		Mineral oil	15% EB	Mineral oil	15% EB	Mineral oil	15% EB
Measurement		No. Brp puncta/μm3	No. Brp puncta/μm3	No. Brp puncta/μm3	No. Brp puncta/μm3	No. Brp puncta/μm3	No. Brp puncta/μm3
		2.85056	5.03231	2.5026	0.719273	0.513649	1.94252
		1.38864	2.90394	2.92397	0.590303	13.9389	6.22651
		0.929069	4.18805	3.57348	4.90479	4.12624	1.78652
		1.61482	7.64184	3.30256	4.54612	2.67553	0.791649
		1.86836	24.1437	12.9921	10.7619	6.6924	1.2405
		0.824042	7.42867	6.43682	0.316203	2.66664	1.14582
		1.43808	0.727953	2.30719	17.9683	4.07787	8.17125
		5.1762	2.22465	1.57654	37.9317	5.72514	5.01352
		3.44421	6.39641		1.69882	2.40935	8.89255
		1.90205	2.49896		5.38087	1.84031	6.23319
		2.12928	4.21702		3.44962	5.36947	3.66014
		2.84621			1.67944	5.64979	6.13594
		3.27128			1.16503	4.3397	25.5042
		2.87689			131.596	3.53785	7.73993
		2.07309					1.19016
		2.23437					0.679833
		3.09823					5.4651
		5.61773					1.74612
		10.8766					4.62609
		2.68861					2.45399
		3.59888					43.9513
							1.49999
							0.863688
							14.8901
							3.89258
Descriptive statistics	Sample size (n)	21 ALs	11 ALs	8 ALs	14 ALs	14 ALs	25 ALs
	Minimum	0.82	0.73	1.58	0.32	0.51	0.68
	25% Percentile	1.74	2.5	2.358	1.058	2.605	1.37
	Median	2.69	4.22	3.11	4	4.105	3.89
	75% Percentile	3.355	7.43	5.723	12.56	5.67	6.985
	Maximum	10.88	24.14	12.99	131.6	13.94	43.95
Kruskal-Wallis test	p value	0.4709

## Sheet: Fig. 5 Supplement 1C
Source data for Leier & Foden et al. (2025)
Figure 5—figure supplement 1C
Genotype		w; or42a-mcd8::GFP/UAS-mcd8::RFP; GMR56F03-Gal4/UAS-luciferase		w; or42a-mcd8::GFP/UAS-mcd8::RFP; GMR56F03-Gal4/UAS-draper RNAi		w; or42a-mcd8::GFP/UAS-draper-I RNAi; GMR56F03-Gal4/UAS-mcd8::RFP
Odorant exposure (0-2 DPE)		Mineral oil	15% EB	Mineral oil	15% EB	Mineral oil	15% EB
Measurement		No. Brp puncta/μm3	No. Brp puncta/μm3	No. Brp puncta/μm3	No. Brp puncta/μm3	No. Brp puncta/μm3	No. Brp puncta/μm3
		0.860066	1.33403	0.899672	0.806861	0.122754	1.77375
		2.14578	1.51673	0.976811	0.709119	1.41184	0.975686
		0.56995	0.717385	0.932703	1.99067	0.977933	5.02798
		0.933414	1.88998	1.00968	1.46711	0.92511	1.16268
		1.20873	2.08601	0.941872	0.869482	0.878586	0.385262
		1.13727	1.37838		0.99636	1.05972	1.13897
			0.412513		0.897141	0.661797	1.31432
			3.89439		0.802229	1.50648	0.972525
			1.28344		0.687492	1.64845	1.05747
			1.23896		1.24398	0.974265	0.704479
			1.50708		1.05141	1.39317	1.13573
			0.746269		0.840138	2.88904	1.12467
			0.914696		0.895931	0.362724	1.5691
			0.72779		0.497836	0.535173	1.32004
			0.171524		0.856898
			7.30583		0.167653
			1.65289		1.96612
			0.941821		0.643589
			0.989445		0.815488
			5.03387		0.51355
			2.50762		0.888073
			0.655213		0.961186
			5.02885		1.47965
			1.37987
			0.582733
			1.39784
			0.987185
			0.982132
			1.64679
Descriptive statistics	Sample size (n)	6 ALs	29 ALs	5 ALs	23 ALs	14 ALs	14 ALs
	Minimum	0.57	0.17	0.9	0.17	0.12	0.39
	25% Percentile	0.7875	0.83	0.915	0.71	0.63	0.9775
	Median	1.035	1.33	0.94	0.87	0.975	1.14
	75% Percentile	1.445	1.77	0.995	1.05	1.435	1.383
	Maximum	2.15	7.31	1.01	1.99	2.89	5.03
Kruskal-Wallis test	p value	0.1085
