# Supplementary material for: Glia control experience-dependent plasticity in an olfactory critical period
Source: eLife. 2025 Jan 30;13:RP100989. doi: 10.7554/eLife.100989 (PMC11781797; doi:10.7554/eLife.100989)
Supplement: Figure 6—source data 1. [file elife-100989-fig6-data1.xlsx]

## Sheet: Fig. 6A
Source data for Leier & Foden et al. (2025)
Figure 6A
Genotype		w; or42a-mcd8::GFP/UAS-mcd8::RFP; GMR56F03-Gal4/UAS-luciferase
Odorant exposure (0-2 DPE)		Mineral oil	15% EB
Measurement		Percent VM7 overlap with EG	Percent VM7 overlap with EG
		5	4.39195
		6.44157	76.5867
		4.52239	52.4581
		3.05149	57.0583
		1.18011	33.8723
		3.01018	51.7108
			7.19436
			26.9374
			9.68804
			1.37164
			4.7234
			12.3413
			15.2194
			27.4675
			63.2188
			6.25187
			10.0034
			26.944
			23.3057
			26.6549
			40.414
			18.6321
			14.7818
			18.1918
			26.7961
			5.92
			7.42
Descriptive statistics	Sample size (n)	6 ALs	27 ALs
	Mean	0.03868	0.248
	Std. Deviation	0.01842	0.2019
Shapiro-Wilk normality test	W	0.9773	0.8855
	p value	0.9376	0.0063
Mann-Whitney test	p value	<0.01

## Sheet: Fig. 6B
Source data for Leier & Foden et al. (2025)
Figure 6B
Genotype		w; or42a-mcd8::GFP/UAS-draper-I RNAi; GMR56F03-Gal4/UAS-mcd8::RFP
Odorant exposure (0-2 DPE)		Mineral oil	15% EB
Measurement		Percent VM7 overlap with EG	Percent VM7 overlap with EG
		10.1616	5.45106
		11.8576	2.6801
		1.74073	11.9702
		2.63445	12.6879
		28.4662	7.76356
		10.093	18.0403
		1.01243	13.0375
		2.68804	9.70219
		3.27668	0.271915
		5.35199	0.844549
		2.11057	19.3678
		5.34845	7.57027
		4.47006
		8.71895
Descriptive statistics	Sample size (n)	14 ALs	12 ALs
	Mean	0.06995	0.09116
	Std. Deviation	0.07113	0.06231
Shapiro-Wilk normality test	W	0.737	0.957
	p value	0.0009	0.7409
Mann-Whitney test	p value	0.274

## Sheet: Fig. 6C
Source data for Leier & Foden et al. (2025)
Figure 6C
Genotype		w; or42a-mcd8::GFP/UAS-mcd8::RFP; GMR56F03-Gal4/UAS-draper RNAi
Odorant exposure (0-2 DPE)		Mineral oil	15% EB
Measurement		Percent VM7 overlap with EG	Percent VM7 overlap with EG
		12.5346	17.0257
		24.5575	3.92937
		4.86667	11.387
		9.13133	30.4171
		30.0119	20.7378
			4.57362
			6.90392
			3.0871
			6.64639
			13.358
			2.48181
			15.916
			4.86153
			7.22428
			2.9696
			2.74543
			18.2493
			15.8339
			6.19553
			3.1576
			0.825053
Descriptive statistics	Sample size (n)	5 ALs	21 ALs
	Mean	0.1622	0.09454
	Std. Deviation	0.1064	0.07741
Shapiro-Wilk normality test	W	0.923	0.8673
	p value	0.5495	0.0086
Mann-Whitney test	p value	0.1381
