# Supplementary material for: Glia control experience-dependent plasticity in an olfactory critical period
Source: eLife. 2025 Jan 30;13:RP100989. doi: 10.7554/eLife.100989 (PMC11781797; doi:10.7554/eLife.100989)
Supplement: Figure 7—source data 1. [file elife-100989-fig7-data1.xlsx]

## Sheet: Fig. 7B
Source data for Leier & Foden et al. (2025)
Figure 7B
Genotype		w; UAS-mcd8::RFP/+; GM456F03-Gal4/Mi{MIC}draper::EGFP-FlAsH-StrepII-TEV-3xFlag
Odorant exposure (0-2 DPE)		Mineral oil	15% EB
Measurement		Draper::GFP mean fluorescence intensity (AU)	Draper::GFP mean fluorescence intensity (AU)
		1128.42	873.296
		999.206	1223.51
		966.526	1044.11
		1004.92	1620.67
		636.694	2608.96
		770.966	967.912
		1104.62	1441.52
		816.898	1918.8
		791.323	982.729
		834.654	2066.36
		593.517	589.235
		779.137	3140.83
		1055.19	1979.36
		903.991	1523.06
		790.764	1461.73
		743.838	808.562
		1241.03	1948.25
		910.005	663.499
		1401.69	3628.13
		881.922	2702.77
		1071.92	2308.85
		1052.02	1553.35
		1180.49	2486.78
		1175.9	2080.9
			774.45
			1698.3
			2268.44
			683.961
			836.044
			1632.02
			1204.77
			1535.06
			2379.25
			544.56
			942.537
			1592.9
			1488.86
			1717.19
			1295.07
			1620.56
			1190.38
Descriptive statistics	Sample size (n)	24 ALs	41 ALs
	Mean	951.5	1586
	Std. Deviation	198.9	712.7
Shapiro-Wilk normality test	W	0.982	0.9528
	p value	0.9301	0.0881
Mann-Whitney test	p value	<0.0001

## Sheet: Fig. 7D
Source data for Leier & Foden et al. (2025)
Figure 7D
Genotype		w; GMR56F03-LexA/or42a-Gal4; UAS-pHluorin::tdTomato/+
Odorant exposure (0-2 DPE)		Mineral oil	15% EB
Measurement		pHluorin/tdTomato mean fluorescence ratio	pHluorin/tdTomato mean fluorescence ratio
		3.06437	1.77506
		3.23471	0.769998
		3.17268	2.24626
		2.98963	2.984
		3.07417	2.10814
		2.96689	0.670886
		3.36739	2.07015
		3.44587	3.42952
		3.00929
		2.5145
		2.87815
		3.0481
		3.1779
		3.03932
		2.83562
		2.95235
		3.09595
		3.19773
		2.70989
		2.55152
		2.86201
		3.13156
Descriptive statistics	Sample size (n)	22 ALs	8 ALs
	Mean	3.015	2.007
	Std. Deviation	0.2299	0.9576
Shapiro-Wilk normality test	W	0.965	0.9383
	p value	0.5959	0.5943
Mann-Whitney test	p value	<0.01

## Sheet: Fig. 7E
Source data for Leier & Foden et al. (2025)
Figure 7E
Genotype		w; GMR56F03-LexA/or42a-Gal4; UAS-pHluorin::tdTomato/LexAop-draper RNAi #1
Odorant exposure (0-2 DPE)		Mineral oil	15% EB
Measurement		pHluorin/tdTomato mean fluorescence ratio	pHluorin/tdTomato mean fluorescence ratio
		2.666	3.33989
		2.62176	3.17101
		2.63475	2.86979
		2.32806	2.91074
		2.80282	3.46729
		2.49423	2.53739
		3.03013	3.16888
		2.87566	2.89702
		2.30341
		3.03688
		2.25179
		2.95784
		2.79403
		2.87509
		2.64387
		2.99374
		2.95962
		2.32105
		2.96356
		2.156
Descriptive statistics	Sample size (n)	20 ALs	8 ALs
	Mean	2.686	3.045
	Std. Deviation	0.2885	0.2988
Shapiro-Wilk normality test	W	0.9066	0.9586
	p value	0.055	0.7964
Mann-Whitney test	p value	0.5765

## Sheet: Fig. 7F
Source data for Leier & Foden et al. (2025)
Figure 7F
Genotype		w; GMR56F03-LexA/LexAop-draper RNAi #2; UAS-pHluorin::tdTomato/or42a-Gal4
Odorant exposure (0-2 DPE)		Mineral oil	15% EB
Measurement		pHluorin/tdTomato mean fluorescence ratio	pHluorin/tdTomato mean fluorescence ratio
		3.1062	2.41995
		2.25649	2.03947
		2.87849	2.60206
		2.21015	3.24818
		2.66086	2.73052
		2.52683	2.56787
		2.47403	3.26965
		2.13769	1.88695
		2.91824	2.17244
		2.9411	2.3827
		1.96924	2.89182
		2.09907	3.24542
		2.45878	2.30883
		2.66172	3.40926
		2.11604	2.23934
Descriptive statistics	Sample size (n)	15 ALs	15 ALs
	Mean	2.494	2.628
	Std. Deviation	0.3585	0.4878
Shapiro-Wilk normality test	W	0.9433	0.9355
	p value	0.4261	0.3289
Mann-Whitney test	p value	>0.9999
